1 **A long-chain fatty acid elongase Elovl6 regulates mechanical damage-induced**  
2 **keratinocyte death and skin inflammation**

3

4

5 Yoshiyuki Nakamura <sup>1</sup>, Takashi Matsuzaka <sup>2</sup>, Satoko Tahara-Hanaoka <sup>1,3</sup>, Kazuko  
6 Shibuya <sup>1,3</sup>, Hitoshi Shimano <sup>2,3,4,5</sup>, Chigusa Nakahashi-Oda <sup>1</sup>, Akira Shibuya <sup>1,3</sup>

7

8 Departments of <sup>1</sup>Immunology and <sup>2</sup>Internal Medicine (Endocrinology and Metabolism),  
9 Faculty of Medicine, <sup>3</sup>Life Science Center of Tsukuba Advanced Research Alliance  
10 (TARA), and <sup>4</sup>International Institute for Integrative Sleep Medicine (WPI-IIIS),  
11 University of Tsukuba, 1-1-1 Tennodai, Tsukuba, Ibaraki 305-8575, Japan  
12 <sup>5</sup>AMED-CREST, Japan Agency for Medical Research and Development (AMED),  
13 1-7-1, Ohte-machi, Chiyoda-ku, Tokyo, 100-0004, Japan

14

15 Correspondence should be addressed to Akira Shibuya (e-mail:  
16 ashibuya@md.tsukuba.ac.jp; tel: +81-29-853-3281; fax: +81-29-853-3410) or Chigusa  
17 Nakahashi-Oda (e-mail: chigusano@md.tsukuba.ac.jp; tel: +81-29-853-3281; fax:  
18 +81-29-853-3410)

19

20 This research was supported in part by grants provided by the Ministry of Education,  
21 Culture, Sports, Science, and Technology of Japan (to A.S. [16H06387, 15H01365] and  
22 C. N.-O. [16H05350]). Y.N. is a fellow of the Kibo Project of the Tadamitsu Kishimoto  
23 Foundation of the Japanese Society of Immunology.

24

25

26

27

28 **Abstract**

29 Mechanical damage on the skin not only affect the barrier function but also induce  
30 various immune responses, which trigger or exacerbate the inflammation in healthy  
31 individuals and patients with inflammatory skin diseases. However, how mechanical  
32 damage-induced skin inflammation is regulated remains largely unknown. Here, we  
33 show that mechanical damage due to tape stripping triggered keratinocyte death and  
34 release of danger-associated molecular patterns (DAMPs) such as high-mobility group  
35 box 1 protein (HMGB-1) and IL-1 $\alpha$ , which induced production of proinflammatory  
36 cytokines and chemokines IL-1 $\beta$  and CXCL-1 by keratinocytes in mice. We also show  
37 that a long-chain fatty acid elongase Elovl6 is expressed in keratinocytes. Mice deficient  
38 in Elovl6 had increased epidermal levels of cis-vaccenic acid (CVA); this accelerated  
39 keratinocyte death triggered by tape stripping and release of DAMPs and exacerbated  
40 skin inflammation. Our results demonstrate that Elovl6 regulates mechanical damage-  
41 triggered keratinocyte death and skin inflammation.

42

43

44 **Introduction**

45 The mechanical damage induced by physical forces—including stretching, compression,  
46 and friction—on epithelial and endothelial cells plays a critical role in tissue  
47 homeostasis (Abe and Berk 2014; Angelini *et al.* 2012; Hofmann *et al.* 2004; Reichelt  
48 2007; Wyatt *et al.* 2016). Under physiologic conditions, keratinocytes are the epidermal  
49 cell population most affected by mechanical damage (Reichelt 2007), which induces  
50 them to proliferate and produce cytokines. Stretching of keratinocytes in vitro opens  
51 Ca<sup>2+</sup> channels, resulting in the phosphorylation of Akt (Yano *et al.* 2006). This process  
52 also induces clustering and co-localization of  $\beta$ -integrins and epidermal growth factor  
53 receptor, followed by activation of the downstream signaling molecule extracellular  
54 signal-regulated kinase (ERK) 1/2 (Knies *et al.* 2006).

55 Mechanical damage not only affect the barrier function of the skin but also  
56 induce various immune responses (Verhoeven *et al.* 2008), which trigger inflammation  
57 at the site of the stress on the skin of healthy individuals. Moreover, mechanical damage  
58 on the skin exacerbates the inflammation in patients with inflammatory skin diseases.  
59 For example, scratching of itching lesions exacerbates the skin inflammation in atopic  
60 dermatitis (AD), which is called the itch-scratch cycle (Verhoeven *et al.* 2008; Verhoeven  
61 *et al.* 2009; Wahlgren 1999). In addition, scratching induces development of new skin

62 lesions in psoriasis, well known as the Koebner phenomenon (Köbner 1876). However,  
63 how mechanical damage-induced skin inflammation is regulated remains largely  
64 unknown.

65         Elongation of long-chain fatty acids family member 6 (Elovl6) is a  
66 rate-limiting microsomal enzyme that catalyzes the elongation of saturated and  
67 monounsaturated fatty acids (Saito *et al.* 2011). Elovl6 elongates palmitate (PA) (C16:0)  
68 to stearate (SA) (C18:0) and palmitoleate (POA) (C16:1n-7) to cis-vaccenic acid (CVA)  
69 (C18:1n-7) (Saito *et al.* 2011). Elovl6 is highly expressed in white adipose tissue and  
70 liver (Matsuzaka *et al.* 2002). In previous studies, mice deficient in Elovl6 (*Elovl6*<sup>-/-</sup>  
71 mice) had increased levels of PA in the liver and lung (Matsuzaka *et al.* 2007; Sunaga *et*  
72 *al.* 2013). Elovl6 is involved in metabolic diseases, such as insulin resistance  
73 (Matsuzaka *et al.* 2007) and atherogenesis (Saito *et al.* 2011), as well as inflammatory  
74 diseases, including attenuated high-fat-diet-induced hepatic inflammation (Matsuzaka  
75 *et al.* 2012) and regulated bleomycin-induced pulmonary fibrosis (Sunaga *et al.* 2013) .  
76 In addition, Elovl6 is highly expressed in skin (Matsuzaka *et al.* 2002), which is one of  
77 the most lipid-enriched organs. Lipids in the skin play crucial roles in homeostasis; they  
78 are involved in epidermal permeability and barrier function (Ishikawa *et al.* 2010), the

79 composition of microbiota (Nguyen *et al.* 2016), epithelialization (Liu *et al.* 2014), and  
80 inflammation (Zhang *et al.* 2015).

81 In the current study, we examined how mechanical damage induces skin  
82 inflammation and whether long-chain fatty-acid composition regulated by Elovl6 is  
83 involved in mechanical damage onto the skin.

84

85 **Results**

86 ***Elovl6*<sup>-/-</sup> mice show exacerbated mechanical damage–induced skin inflammation.**

87 Tape stripping, which mimics scratching, is a well-established method for inducing  
88 mechanical stress or damage on the skin (Onoue *et al.* 2009; Takahashi *et al.* 2013). To  
89 investigate the role of *Elovl6* in mechanical damage–induced skin inflammation, we  
90 established a mouse model of dermatitis by using repeated tape stripping twenty times,  
91 which induced the skin damage and barrier disruption. After this treatment, erythema  
92 was more severe in *Elovl6*<sup>-/-</sup> mice than in wild-type mice (**Figure 1A**). Moreover, the  
93 epidermis was thicker, and neutrophil infiltration was significantly greater, in *Elovl6*<sup>-/-</sup>  
94 mice than in wild-type mice (**Figure 1B–D**). Since *Elovl6* expression was higher in the  
95 epidermis than in the dermis (**Figure supplement 1A**), we speculated that *Elovl6* is  
96 expressed in keratinocytes. Indeed, the epidermis in mice deficient in *Elovl6*  
97 specifically in the keratinocytes (*Elovl6*<sup>fl/fl</sup> *K14*-Cre mice) showed significantly  
98 decreased *Elovl6* expression (**Figure supplement 1B**). As in *Elovl6*<sup>-/-</sup> mice, *Elovl6*<sup>fl/fl</sup>  
99 *K14*-Cre mice also showed increased epidermal thickness and neutrophil infiltration  
100 after tape stripping compared with control mice (**Figure 1E, F**).

101 To address how *Elovl6* suppressed mechanical damage-induced skin  
102 inflammation, we compared skin barrier function of *Elovl6*<sup>-/-</sup> mice with that of wild-type

103 mice. However, it was comparable between two genotypes of mice, as determined by  
104 toluidine blue skin permeability assay and a transepidermal water loss test (Sassa *et al.*  
105 2013) (**Figure supplement 2A, B**). These results suggested that Elov16 in the  
106 keratinocytes suppressed mechanical damage-induced skin inflammation, in which a  
107 novel mechanism might be involved.

108

109 ***Elov16*<sup>-/-</sup> mice show increased IL-1 $\beta$  and CXCL-1 production after mechanical**  
110 **damage**

111 To investigate how Elov16 suppressed mechanical damage-induced skin inflammation,  
112 we examined the expression levels of pro-inflammatory and anti-inflammatory  
113 cytokines and chemokines potentially involved in dermatitis (Effendy *et al.* 2000).  
114 Among them, transcript levels of *Il1b* and *Cxcl1* in epidermis were increased in both  
115 wild-type and *Elov16*<sup>-/-</sup> mice after tape stripping (**Figure 2A and Figure supplement 3**).  
116 Moreover, *Elov16*<sup>-/-</sup> mice showed higher expression of *Il1b* and *Cxcl1* than did wild-type  
117 mice after tape stripping (**Figure 2A**). In accordance with these results, the  
118 concentrations of IL-1 $\beta$  and CXCL-1 were significantly higher in the culture  
119 supernatants of *Elov16*<sup>-/-</sup> epidermis harvested from mice after tape stripping than in those  
120 from wild-type epidermis (**Figure 2B**). These cytokine levels in the epidermis from

121 mice deficient in an adaptor of Toll-like receptors (TLRs) MyD88, but not TRIF, were  
122 lower than those in wild-type mice after tape stripping (**Figure 2C**). These results  
123 suggest that Elov16 suppressed mechanical damage-induced IL-1 $\beta$  and CXCL-1  
124 productions that are dependent on MyD88.

125

126 ***Elov16*<sup>-/-</sup> mice show increased keratinocyte death after mechanical damage**

127 Since histologic analysis of the skin after tape stripping revealed greater numbers of  
128 degenerated keratinocytes in *Elov16*<sup>-/-</sup> mice than in wild-type mice (**Figure 3A**), we  
129 speculated that the number of dead cells were greater in the skin of *Elov16*<sup>-/-</sup> mice than  
130 in that of wild-type mice after tape stripping. Indeed, flow cytometry analysis  
131 demonstrated that, although the proportion of dead keratinocytes in the epidermis of  
132 *Elov16*<sup>-/-</sup> mice was comparable with that in wild-type mice in the steady state, tape  
133 stripping enhanced keratinocyte death in *Elov16*<sup>-/-</sup> mice significantly more than in  
134 wild-type mice (**Fig. 3B, C**). These results suggest that Elov16 suppressed mechanical  
135 damage-induced keratinocyte death.

136

137 **Cis-vaccenic acid (CVA) is increased in *Elov16*<sup>-/-</sup> mice.**



138 To investigate how keratinocytes death and the skin inflammation after tape stripping  
139 were exacerbated in *Elovl6*<sup>-/-</sup> mice, we analyzed the fatty acid composition of the  
140 epidermis of wild-type and *Elovl6*<sup>-/-</sup> mice. Unlike in our previous reports of increased  
141 PA levels in the lung and liver of *Elovl6*<sup>-/-</sup> mice (Matsuzaka *et al.* 2007; Sunaga *et al.*  
142 2013), PA was not increased in the epidermis (**Figure 4A**). Instead, *Elovl6*<sup>-/-</sup> mice had  
143 significantly increased CVA levels (**Figure 4A**) and greater epidermal expression of the  
144 long-chain fatty acid elongases *Elovl1*, *Elovl3*, and *Elovl5* and of the stearyl-CoA  
145 desaturase *Scd3* than did wild-type mice (**Figure 4B**). Among these, *Elovl5* and *Scd3*  
146 may influence CVA generation through the elongation of POA (C16:1n-7) (Burns *et al.*  
147 2012) and by the conversion of PA to POA (Guillou *et al.* 2010), respectively (**Figure**  
148 **supplement 4**). These results suggest that CVA might be involved in the keratinocytes  
149 death and skin inflammation after tape stripping in *Elovl6*<sup>-/-</sup> mice.

150

#### 151 **CVA induces keratinocyte death.**

152 To address whether CVA is involved in keratinocyte death, we cultured a human  
153 keratinocyte cell line HaCaT and primary keratinocytes derived from mice in the  
154 presence of CVA. We found that CVA decreased the numbers of live cells of HaCaT  
155 cells and primary keratinocytes in a dose-dependent manner (**Figure 5A, B**) and

156 increased the proportion of dead primary keratinocytes (**Figure 5C**). In contrast, neither  
157 oleic acid (OA), PA, POA, SA, nor trans-vaccenic acid (TVA) influenced the number of  
158 live primary keratinocytes after culture (**Figure 5A, B, D**). In addition, CVA decreased  
159 the number of live peritoneal macrophages as well (**Figure supplement 5A**). CVA did  
160 not affect the proliferation of HaCaT cells but instead increased the number of dead  
161 cells compared with those after the addition of OA (**Figure 5E**), thus indicating that  
162 treatment with CVA induced cell death of HaCaT cells. This cell death was not affected  
163 by triacsin C, an inhibitor of long-chain acyl-CoA synthetases (Igal *et al.* 1997; Wang *et*  
164 *al.* 2012) (**Figure supplement 5B**), suggesting that CVA itself, but not its metabolites,  
165 induced death of HaCaT cells. Morphologic analyses under transmission electronic  
166 microscopy demonstrated increased plasma membrane rupture without     in the  
167 keratinocytes after CVA treatment (**Figure supplement 5C**). In vivo, we found that  
168 topical application of CVA, but not OA, at a dose of 45 mM to the dorsal skin of  
169 wild-type mice increased the proportion of dead keratinocytes, as analyzed by flow  
170 cytometry (**Figure 5F**). Anti-cleaved caspase-9 (CC9) antibody did not stain  
171 CVA-treated dead keratinocytes (**Figure supplement 5D**). Together, these results  
172 suggest that CVA induced non-apoptotic cell death. Pretreatment with necrostatin-1 or  
173 necrosulfonamide, which are inhibitors of receptor-interacting protein 1 (RIP1) kinase

174 and mixed lineage kinase domain-like protein (MLKL), respectively, did not suppress  
175 the CVA-induced death of keratinocytes (**Figure supplement 5E**), suggesting that the  
176 cell death due to CVA likely was not necroptosis (Skrzeczynska-Moncznik *et al.* 2015;  
177 Zhao *et al.* 2017). These combined results suggest that CVA induced necrosis rather  
178 than programmed cell death of keratinocytes. In addition, treatment with inhibitors of  
179 oxidative stress (IM-54) or cyclophilin D (cyclosporine A) did not influence the cell  
180 death (**Figure supplement 5E**), suggesting that the CVA-induced necrosis of  
181 keratinocytes was independent of oxidative stress (IM-54) or cyclophilin D-mediated  
182 changes in mitochondrial permeability (Chen *et al.* 2013; Nakagawa *et al.* 2005; Zeng *et*  
183 *al.* 2016).

184

### 185 **CVA increased IL-1 $\beta$ and CXCL-1 production.**

186 Since CVA induced non-apoptotic cell death, we then examined whether CVA increased  
187 the release of DAMPs from dead cells. The addition of CVA, but not OA, to cultures of  
188 primary keratinocytes from wild-type mice increased the concentrations of HMGB-1  
189 and IL-1 $\alpha$  in the supernatants (**Figure 6A**). We further examined whether these DAMPs  
190 is involved in the increase in IL-1 $\beta$  and CXCL-1 expression. Stimulation of primary  
191 keratinocytes derived from wild type or *Elovl6*<sup>-/-</sup> mice in vitro and of the epidermis from

192 the either genotype of mice in vivo with HMGB-1 or IL-1 $\alpha$  induced *Il1 $\beta$*  and *Cxcl1*, and  
193 the expression levels of these cytokines transcripts did not differ between both  
194 genotypes of mice (**Figure supplementary 6A, B**). These results suggest that CVA  
195 enhanced IL-1 $\beta$  and CXCL-1 production by keratinocytes via HMGB-1 or  
196 IL-1 $\alpha$ . Indeed, we found that topical application of CVA, but not OA, at a dose of 45  
197 mM to the dorsal skin of wild-type mice increased the expressions of *Il1 $\beta$*  and *Cxcl1* in  
198 the epidermis (**Figure 6B**). Finally, treatment with either antagonist of IL-1 receptor or  
199 CXCR-2 intradermally and intraperitoneally reduced epidermal thickness and the  
200 number of neutrophils in the skin of *Elovl6*<sup>-/-</sup> mice (**Figure 6C, D**). These results  
201 suggest that the IL-1 $\beta$  and CXCL-1 produced by keratinocytes played crucial roles in  
202 the exacerbation of mechanical damage-induced skin inflammation in *Elovl6*<sup>-/-</sup> mice.  
203 Taken all together, these results suggest that tape stripping triggered keratinocyte death  
204 and release of HMGB-1 and IL-1 $\alpha$ , which then stimulated the surrounding live  
205 keratinocytes to produce IL-1 $\beta$  and CXCL-1. *Elovl6* deficiency increased the proportion  
206 of CVA in the skin, which accelerated keratinocyte death triggered by tape stripping and  
207 the subsequent signaling cascade to the production of IL-1 $\beta$  and CXCL-1, thus  
208 exacerbating dermatitis (**Figure 6E**).

209

210

211 **Discussion**

212 Previous studies have revealed increased PA and decreased OA contents in the liver and  
213 lung of *Elovl6*<sup>-/-</sup> mice compared with wild-type mice (Matsuzaka *et al.* 2007; Sunaga *et*  
214 *al.* 2013). In the current study, we noted that the OA level in the skin of *Elovl6*<sup>-/-</sup> mice  
215 was decreased compared with that in wild-type mice. However, PA content did not  
216 differ between the two genotypes. Instead, epidermal levels of CVA were greater in  
217 *Elovl6*<sup>-/-</sup> mice than in wild-type mice, presumably owing to its efficient conversion to  
218 CVA by the concomitant induction of SCD3 and Elovl5 productions (Burns *et al.* 2012;  
219 Guillou *et al.* 2010). Although it remains unclear at present how Elovl6 regulates the  
220 fatty acid composition and the enzyme alteration in the skin, these combined results  
221 suggest that regulation of the elongation of saturated and monounsaturated fatty acids  
222 is—in part—dependent on the organs or tissues.

223 The biologic function of CVA has been poorly understood. Here, we  
224 demonstrated that CVA directly induced cell death in cultures of primary keratinocytes  
225 from mice. Specifically, the cells killed by CVA lacked one of the hallmarks of  
226 apoptosis, namely caspase-9 activation. In addition, morphologic analyses revealed  
227 characteristics of necrosis, including plasma membrane rupture without blebbing  
228 (Krysko *et al.* 2008). None of the inhibitors of necroptosis, oxidative stress, or

229 cyclophilin-D-associated cell death—including necrostatin-1, NSA, IM-54, and  
230 cyclosporine A—inhibited the CVA-induced cell death. In addition, triacsin-C treatment  
231 failed to suppress CVA-induced cell death. These results suggest that CVA induced  
232 necrosis rather than programmed cell death of keratinocytes.

233           Long-chain fatty acids elicit a variety of biologic effects, including cell death.  
234 For example, PA induces apoptosis in many cell types, and this response is abrogated by  
235 OA (Gillet *et al.* 2015; Sunaga *et al.* 2013). In contrast, PA induces  
236 RIP1/RIP3-dependent necroptosis in RAW 264.7 cells (Kim *et al.* 2017), and (although  
237 the results are controversial) OA has been reported to induce the death of various cell  
238 types (Brinkmann *et al.* 2013; Moravcova *et al.* 2015). The molecular mechanisms of  
239 these cytotoxic effects remain poorly understood; features proposed to be involved in  
240 these toxicities include loss of membrane integrity, changes in mitochondrial  
241 transmembrane potential, activation of caspase-3, and the production of reactive oxygen  
242 species (Brinkmann *et al.* 2013; Fontana *et al.* 2013). In the current study, we found that,  
243 beginning soon after its addition to the cultures, CVA was severely cytotoxic to HaCaT  
244 cells, mouse peritoneal macrophages, and primary keratinocytes; CVA can thus be  
245 added to the list of possible lipotoxins.

246 Previous studies have demonstrated that, compared with OA and SA,  
247 supplementation with both CVA and TVA (dose, 30  $\mu$ M) significantly suppress the  
248 growth of HT-29 tumor cells after culture for 9 days (Awad *et al.* 1995). Moreover, CVA  
249 leads to greater hydrolysis of phosphoinositides in the plasma membrane than does TVA  
250 (Awad *et al.* 1995), suggesting that CVA is incorporated into the plasma membrane and  
251 affects the phospholipids composition. In the present study, we showed that CVA at  
252 concentrations of 200  $\mu$ M or greater induced the death, rather than the suppression of  
253 growth, of keratinocytes, thus suggesting that the higher amount of CVA induces  
254 damage of the plasma membrane sufficiently to induce necrosis. In addition, given that  
255 TVA did not induce keratinocyte death, the cytotoxic effect of CVA may be structure  
256 dependent. Whereas trans-unsaturated fatty acids have a linear structure and can be  
257 packed regularly in the plasma membrane, cis-unsaturated fatty acids such as OA and  
258 CVA, which have a characteristic angular kink, may distort the structure of the lipid  
259 bilayer and thus destabilize the plasma membrane (Fontana *et al.* 2013). Therefore,  
260 although further studies are required to determine the detailed mechanism of  
261 CVA-induced cell death, we speculate that incorporation of CVA into the plasma  
262 membrane creates a bulky 3-dimensional structure compared with those associated with

263 other cis-monounsaturated fatty acids and thus induces cell death by disrupting the  
264 plasma membrane.

265 Fatty acids reportedly play important roles in modulating dermatitis. For  
266 example, a high-fat diet enriched with oleic acid impairs contact hypersensitivity  
267 responses to trinitrochlorobenzene and FITC (Katagiri *et al.* 2008). In addition, oral  
268 administration of docosahexaenoic acid leads to the generation of regulatory T cells,  
269 which thus attenuate dinitrochlorobenzene-induced dermatitis (Han *et al.* 2015).

270 Moreover, topical or oral application of linoleic acid and TVA, which are enriched in  
271 milk fat, decreases the severity of OVA-induced atopic dermatitis (Sun *et al.* 2011).

272 Atopic dermatitis (AD) is one of the most common skin diseases and is  
273 characterized by pruritic and eczematous skin lesions. The outermost layer of the  
274 epidermis, the stratum corneum, contains decreased levels of ceramides (very  
275 long-chain fatty acids), leading to impaired barrier function in patients with AD, and the  
276 average chain length of ceramide fatty acids is negatively correlated with epidermal  
277 permeability in these patients (Ishikawa *et al.* 2010). Moreover, *Elovl1*<sup>-/-</sup> and *Elovl4*<sup>-/-</sup>  
278 mice, both of which demonstrate a global decrease in the chain length of ceramide fatty  
279 acids of the stratum corneum, show impaired barrier function (Li *et al.* 2007; Sassa *et al.*  
280 2013). Mechanical stress, such as scratching, increases the severity of AD by removing



281 the stratum corneum (thus diminishing the epidermal barrier function) and by inducing  
282 the production of pro-inflammatory cytokines (Verhoeven *et al.* 2008; Wahlgren 1999).  
283 On the other hand, psoriasis is characterized by well-demarcated scaly erythema and  
284 plaque, which sometimes show itching, and histopathologically, these lesions reveal  
285 hyperproliferation of keratinocytes and neutrophil infiltration (Hirotzu *et al.* 2012). The  
286 skin lesions of psoriasis are well-known to be triggered or exacerbated, as the Koebner  
287 phenomenon, by mechanical stress (Köbner 1876). Our current results suggest that  
288 Elovl6 may regulates mechanical stress-induced exacerbation of skin inflammation due  
289 to inhibition of keratinocyte death by CVA in patients with AD and psoriasis.

290

291

292 **Materials and Methods**

293 **Mice.** *Elovl6*<sup>-/-</sup> mice on the C57BL/6J background were described previously  
294 (Matsuzaka *et al.* 2007). C57BL/6J mice raised under specific pathogen-free conditions  
295 were purchased from Clea Japan (Tokyo, Japan). Germ-free mice were bred and  
296 maintained in isolators at Sankyo Laboratories (Tsukuba, Japan), and their germ-free  
297 status was routinely confirmed by in-house aerobic and anaerobic culture of feces.  
298 *K14-Cre*, *Ticam1*<sup>-/-</sup>, and *Myd88*<sup>-/-</sup> mice on the B57BL/6 background were purchased  
299 from Jackson Laboratories (Bar Harbor, Maine, USA). *Elovl6*<sup>fl/fl</sup> mice were crossed with  
300 *K14-Cre* transgenic mice to generate *Elovl6*-knockout mice specifically in keratinocytes  
301 (*Elovl6*<sup>fl/fl</sup> *K14-Cre*). Mice between 8 and 10 weeks of age were used for the  
302 experiments. All experiments were performed in accordance with the guidelines of the  
303 animal ethics committee of the University of Tsukuba Animal Research Center.

304

305 **Tape stripping (Nakajima *et al.* 2012).** To generate mechanical damage-induced  
306 dermatitis, a 2.5×2.5 cm area of the dorsal skin was shaved and tape-stripped 20 times  
307 by using adhesive tape (Johnson and Johnson); a 1×1-cm piece of sterile gauze  
308 moistened with 100 μl PBS was placed on the shaved skin and secured with transparent  
309 bio-occlusive tape (Tegaderm Roll, 3M, Maplewood, Minnesota, USA) to prevent the

310 mice from licking the area. These procedures were repeated every other day until  
311 analysis.  
312  
313 **Cytokine measurement of epidermis or cultured keratinocytes.** Dorsal skin  
314 samples before and after tape stripping were resected from adult mice and incubated in  
315 RPMI medium in the presence of dispase II (3 mg/ml) (Wako Pure Chemical, Osaka,  
316 Japan) for 1 h at 37 °C under 5% CO<sub>2</sub>. The epidermis was then separated from the  
317 dermis under a stereomicroscope. Samples of epidermis (diameter, 4 mm) were cultured  
318 in 50 µl of DMEM containing 10% FBS in a 96-well plate at 37 °C under 5% CO<sub>2</sub> for  
319 24 h and the concentrations of IL-1β, CXCL-1, TNFα, and IL-10 in the culture  
320 supernatants were measured by using cytometric bead arrays (CBA) (BD Biosciences)  
321 according to the manufacturer's protocol. The skin of new born mice (younger than 3  
322 days old) was incubated in CnT-07 medium (CELLnTEC Advanced Cell Systems) in  
323 the presence of dispase II (1mg/ml) (CELLnTEC Advanced Cell Systems) at 4 °C for  
324 16 h. The epidermis was isolated from the skin and incubated in Accutase (CellnTEC  
325 Advanced Cell Systems) at room temperature for 20 min. The keratinocytes collected  
326 were maintained in CnT-07 medium (CELLnTEC Advanced Cell Systems) according to  
327 the manufacturer's protocol. Keratinocytes were then stimulated with long-chain fatty

328 acids at 37 °C under 5% CO<sub>2</sub> for 10 h and the culture supernatants were analyzed for  
329 IL-1 $\alpha$  and HMBG-1 by flow cytometry using cytokine beads array (CBA) and for  
330 HMGB-1 using an ELISA KIT II (Shino-test Corporation). Keratinocytes were also  
331 stimulated with IL-1 $\alpha$  or HMGB-1 at 37 °C under 5% CO<sub>2</sub> for 3 h and analyzed for *Il1b*  
332 and *Cxcl1* by quantitative real-time PCR analysis (qRT-PCR).  
333  
334 **qRT-PCR.** Total RNA was isolated by using ISOGEN (Wako Pure Chemical).  
335 Quantitative real-time PCR analysis was performed on a 7500 Fast Real-Time PCR  
336 System (Applied Biosystems, Foster City, California, USA) with Power SYBR Green  
337 PCR Master Mix (Applied Biosystems). Results are presented relative to those of the  
338 housekeeping gene encoding GAPDH (*gapdh*). Primers used were as follows: *Il1b* fwd,  
339 GAAATGCCACCTTTTGACAGTG; *Il1b* rev, TGGATGCTCTCATCAGGACAG;  
340 *Cxcl1* fwd, CTGGGATTCACCTCAAGAACATC; *Cxcl1* rev,  
341 CAGGGTCAAGGCAAGCCTC; *Ccl2* fwd, CAGGTCCCTGTCATGCTTC; *Ccl2* rev  
342 ATGAGTAGCAGCAGGTGAGTG; *Elovl6* fwd, ACAATGGACCTGTCAGCAAA;  
343 *Elovl6* rev, GTACCAGTGCAGGAAGATCAGT; *Tnfa* fwd,  
344 CCTGTAGCCCACGTCGTAG; *Tnfa* rev, GGGAGTAGACAAGGTACAACCC; *Il1a*  
345 fwd, AGGGAGTCAACTCATTGGCG; *Il1a* rev, TGGCAGAACTGTAGTCTTCGT; *Il6*

346 rev, TCCACGATTTCCCAGAGAAC; *Il10* fwd, GCTGGACAACATACTGCTAACC;  
347 *Il10* rev, ATTTCCGATAAGGCTTGGCAA; *Il33* fwd,  
348 GGTGAACATGAGTCCCATCA; *Il33* rev, CGTCACCCCTTTGAAGCTC; *Tgfb* fwd,  
349 TGACGTCACTGGAGTTGTACGG; *Tgfb* rev, GGTTTCATGTCATGGATGGTGC;  
350 *Ccl2* rev ATGAGTAGCAGCAGGTGAGTG; *Ifng* fwd,  
351 ACAGCAAGGCGAAAAAGGATG; *Ifng* rev, TGGTGGACCACTCGGATGA; *Il4*  
352 fwd; ATCATCGGCATTTTGAACGAGG; *Il4* rev; TGCAGCTCCATGAGAACACTA;  
353 *Il17* fwd, TTTAACTCCCTTGGCGCAAAA; *Il17* rev,  
354 CTTTCCCTCCGCATTGACAC; *Elovl1* fwd, TCCAAAGCTACCCTCTGATGG;  
355 *Elovl1* rev, AGGGAGAGTATCACCAGTGAGA; *Elovl2* fwd,  
356 ACGCTGGTCATCCTGTTCTT; *Elovl2* rev, GCCACAATTAAGTGGGCTTT; *Elovl3*  
357 fwd, TTCTCACGCGGGTTAAAAATGG; *Elovl3* rev,  
358 GAGCAACAGATAGACGACCAC; *Elovl4* fwd, GCCCTGTGGTGGTATTTTGT;  
359 *Elovl4* rev, TGGTGGTACACGTGAAGGAA; *Elovl5* fwd,  
360 GGTGGCTGTTCTTCCAGATT , *Elovl5* rev, CCCTTCAGGTGGTCTTTCC, *Elovl6*  
361 fwd, ACAATGGACCTGTCAGCAAA; *Elovl6* rev,  
362 GTACCAGTGCAGGAAGATCAGT; *Elovl7* fwd, CATCGAGGACTGTGCGTTTTT;  
363 *Elovl7* rev, CCAGGATGATGGTTTGTGGCA; *Scd1* fwd,

364 TCAACTTCACCACGTTCTTCA; *Scd1* rev, CTCCCGTCTCCAGTTCTCTT; *Scd2*  
365 fwd, TGGTTTCCATGGGAGCTG; *Scd2* rev, TTGATGTGCCAGCGGTACT; *Scd3*  
366 fwd, CTGACCTGAAAGCCGAGAAG; *Scd3* rev, GCAGAATGCCAGGCTTGTA;  
367 *Gapdh* fwd, AGGTCGGTGTGAACGGATTTG; and *Gapdh* rev  
368 TGTAGACCATGTAGTTGAGGTCA.

369

370 **Histology.** For histologic analysis, mouse skin was fixed in 10% formalin, embedded in  
371 paraffin, sectioned, and stained with hematoxylin and eosin. For analysis of epidermal  
372 thickness or cell number, 18 randomly selected sites were evaluated by using light  
373 microscopy or fluorescent microscopy (MZ-X710, Keyence, Osaka, Japan) and its  
374 associated software.

375

376 **Analysis of cleaved caspase-9.** Cells were treated or not with CVA or UV (180 mJ/  
377 cm<sup>2</sup> for 3 min) and then fixed with 4% paraformaldehyde for 15 min and then with 5 %  
378 BSA in PBS containing 0.3% Triton X-100 for 1 h. Subsequently, cells were incubated  
379 with rabbit anti-cleaved caspase-9 antibody (1:200; Cell Signaling) for 1 h at room  
380 temperature, followed by incubation with Alexa Fluor 594-conjugated donkey

381 anti-rabbit IgG (1:200; Thermo Fisher Scientific) secondary antibody for 30 min.  
382 Finally, cells were counterstained with DAPI.  
383  
384 **Cell death and proliferation analyses.** Primary keratinocytes from neonatal epidermis,  
385 prepared as described above, or human HaCaT cells were maintained in CnT-07  
386 medium, as described above, and DMEM with 10% FBS, respectively, at 37 °C under  
387 5% CO<sub>2</sub>. Peritoneal macrophages were harvested by lavage of the peritoneal cavity and  
388 suspended in DMEM containing 10% FBS. Primary keratinocytes and HaCaT cells and  
389 peritoneal macrophages were seeded onto 48-well plates at a density of 1×10<sup>5</sup> cells and  
390 2×10<sup>5</sup> cells/ well, respectively. After incubation at 37 °C for 2 h, the cells were washed  
391 with PBS three times to remove unattached cells and stimulated with different  
392 concentrations of free fatty acids dissolved in ethanol (final dose of 100 ~ 500 μM),  
393 including oleic acid (OA), palmitic acid (PA), stearic acid (SA), palmitoleic acid (POA)  
394 (Wako Pure Chemical), trans-vaccenic acid (TVA) or cis-vaccenic acid (CVA)  
395 (Sigma-Aldrich). To block specific types of cell death or inhibit long-chain  
396 acyl-coenzyme A synthetase, cells were pretreated with 1 mM of necrostatin-1 (Cayman  
397 Chemicals), 1 mM of necrosulfonamide (Cellagen Technology), 2 mM of IM-54 (Sigma

398 Aldrich), 1 mM of cyclosporine A (Sigma Aldrich), or 10  $\mu$ M of triacsin C (Abcam) for  
399 6 h before fatty acid stimulation.

400 For proliferation assay, these cells were stained or not with 10  $\mu$ M of CFSE  
401 (Invitrogen) for 5min at 37°C before fatty acid stimulation, according to the  
402 manufacturer instructions. Cells were then stained with propidium iodine (PI) and  
403 analyzed for PI-positive and -negative cell populations and CFSE dilution by flow  
404 cytometry. For the analysis of cell death in vivo, skin tissue was incubated in 0.5%  
405 trypsin (Wako) in PBS, and separated into epidermis. Epidermal cells were stained with  
406 CD45.2 (clone:104, BD pharmingen), CD49f (clone: GoH3, Miltenyi Biotec) and PI,  
407 and then analyzed by flow cytometry.

408

409 **Transmission electron microscopy.** Cultured keratinocytes were fixed by incubating  
410 2.5% glutaraldehyde in PBS (pH 7.4) at 4 °C overnight, postfixed in 1% osmium  
411 tetraoxide at 4 °C for 30 min, and then dehydrated through graded concentrations of  
412 ethanol. Cells were then transferred to propylene oxide and embedded (Poly/Bed 812,  
413 Polysciences, Warrington, Pennsylvania, USA). The samples were analyzed by electron  
414 microscopy (JEM-1400, JEOL, Peabody, Massachusetts, USA).

415



416 **Cytokine stimulation.** Primary mouse keratinocytes were stimulated with bovine  
417 HMGB-1 (Chondrex, Redmond, Washington, USA) or mouse IL-1 $\alpha$  (Miltenyi Biotec,  
418 Bergisch Gladbach, Germany). For stimulation of keratinocytes in vitro, primary  
419 keratinocytes were stimulated 500ng/ml of bovine HMGB-1 or mouse IL-1 $\alpha$ . For  
420 stimulation of keratinocytes in vivo, 200 ng of bovine HMGB-1 or mouse IL-1 $\alpha$  in 50  
421  $\mu$ l PBS was injected intradermally.  
422  
423 **Fatty acid composition.** Lipids from mouse epidermis were extracted by using the  
424 method of Bligh and Dyer (Breil *et al.* 2017). In brief, epidermis was extracted with  
425 chloroform/ methanol (1:2, v/v) solution. One molar NaCl solution and chloroform were  
426 added to break the monophasic and incubated on ice for 10 min. After centrifugation at  
427 300 G for 5 min, aqueous solution was discarded and the phase of chloroform was  
428 evaporated using nitrogen gas. Following the addition of acetonitrile/ 6N HCl (90/10,  
429 v/v), samples were incubated at 100 °C for 45 min. Finally, liquid-liquid extraction  
430 (Milne and Zhitomirsky 2018) with ethyl acetate was performed and the reconstituted  
431 samples were injected into an optimized LC/ MS/MS system. The relative abundance of  
432 each fatty acid was quantified by gas chromatography.  
433

434 **Transepidermal water loss (TEWL) test.** Fetuses obtained at E13.5 and E17.5 were  
435 incubated in methanol for 5 min and rinsed in PBS, followed by incubation with 0.1%  
436 toluidine blue for 24 h. After staining, fetuses were rinsed with PBS and the staining  
437 intensity was evaluated (Sassa *et al.* 2013). TEWL was also measured on the dorsal skin  
438 of wild-type and *Elovl6*<sup>-/-</sup> mice between 8 and 10 weeks of age by Tewameter<sup>®</sup> TM 300  
439 (Integral) before and after tape stripping (Sassa *et al.* 2013). Measurements were  
440 performed in triplicate for each mouse.

441

442 **Antagonist treatment.** To neutralize the IL-1 receptor, mice received 200 µl of the IL-1  
443 receptor antagonist anakinra (10 mg/ml) (Kineret, Swedish Orphan Biovitrum)  
444 intradermally and 300 µl of the same concentration of the antagonist intraperitoneally  
445 daily during the induction of dermatitis by the mechanical stress or OVA treatment. To  
446 block CXCR-2, mice received 200 µl of a CXCR-2 antagonist (0.25 mg/ml in PBS  
447 containing 1% DMSO) (SB225002, Cayman Chemical, Ann Arbor, Michigan, USA)  
448 intradermally and 150 µg of the same antagonist (0.5 mg/ml in PBS containing 1%  
449 DMSO) intraperitoneally daily during the induction of dermatitis by the mechanical  
450 stress.

451

Nakamura et al

452 **Statistical analyses.** Statistical analyses were performed by using an unpaired,  
453 two-tailed Student's *t*-test (GraphPad Prism 6, GraphPad Software, La Jolla, USA). A *P*  
454 value less than 0.05 was considered to be statistically significant.

455 **Acknowledgments**

456 We thank S. Mitsuishi and Y. Nomura for their secretarial assistance.

457

458 **References**

- 459 Abe, J., and B. C. Berk. 2014. Novel mechanisms of endothelial mechanotransduction.  
460 *Arterioscler Thromb Vasc Biol* 34:2378-2386
- 461 Angelini, T. E., A. C. Dunn, J. M. Uruena, D. J. Dickrell, 3rd, D. L. Burris, and W. G.  
462 Sawyer. 2012. Cell friction. *Faraday Discuss* 156:31-39; discussion 87-103
- 463 Awad, A. B., T. Herrmann, C. S. Fink, and P. J. Horvath. 1995. 18:1 n7 fatty acids  
464 inhibit growth and decrease inositol phosphate release in HT-29 cells compared to n9  
465 fatty acids. *Cancer Lett* 91:55-61
- 466 Breil, C., M. Abert Vian, T. Zemb, W. Kunz, and F. Chemat. 2017. "Bligh and Dyer"  
467 and Folch Methods for Solid-Liquid-Liquid Extraction of Lipids from Microorganisms.  
468 Comprehension of Solvation Mechanisms and towards Substitution with Alternative  
469 Solvents. *Int J Mol Sci* 18
- 470 Brinkmann, C. R., S. Thiel, and D. E. Otzen. 2013. Protein-fatty acid complexes:  
471 biochemistry, biophysics and function. *FEBS J* 280:1733-1749
- 472 Burns, T. A., A. K. Kadegowda, S. K. Duckett, S. L. Pratt, and T. C. Jenkins. 2012.  
473 Palmitoleic (16:1 cis-9) and cis-vaccenic (18:1 cis-11) acid alter lipogenesis in bovine  
474 adipocyte cultures. *Lipids* 47:1143-1153
- 475 Chen, B., M. Xu, H. Zhang, J. X. Wang, P. Zheng, L. Gong, G. J. Wu, and T. Dai. 2013.  
476 Cisplatin-induced non-apoptotic death of pancreatic cancer cells requires mitochondrial  
477 cyclophilin-D-p53 signaling. *Biochem Biophys Res Commun* 437:526-531
- 478 Effendy, I., H. Loffler, and H. I. Maibach. 2000. Epidermal cytokines in murine  
479 cutaneous irritant responses. *J Appl Toxicol* 20:335-341
- 480 Fontana, A., B. Spolaore, and P. Polverino de Laureto. 2013. The biological activities of  
481 protein/oleic acid complexes reside in the fatty acid. *Biochim Biophys Acta*  
482 1834:1125-1143
- 483 Gillet, C., D. Spruyt, S. Rigutto, A. Dalla Valle, J. Berlier, C. Louis, C. Debier, N.  
484 Gaspard, W. J. Malaisse, V. Gangji, and J. Rasschaert. 2015. Oleate Abrogates  
485 Palmitate-Induced Lipotoxicity and Proinflammatory Response in Human Bone  
486 Marrow-Derived Mesenchymal Stem Cells and Osteoblastic Cells. *Endocrinology*  
487 156:4081-4093
- 488 Guillou, H., D. Zadavec, P. G. Martin, and A. Jacobsson. 2010. The key roles of  
489 elongases and desaturases in mammalian fatty acid metabolism: Insights from  
490 transgenic mice. *Prog Lipid Res* 49:186-199
- 491 Han, S. C., D. H. Koo, N. J. Kang, W. J. Yoon, G. J. Kang, H. K. Kang, and E. S. Yoo.  
492 2015. Docosaheptaenoic Acid Alleviates Atopic Dermatitis by Generating Tregs and

- 493 IL-10/TGF-beta-Modified Macrophages via a TGF-beta-Dependent Mechanism. *J*  
494 *Invest Dermatol* 135:1556-1564
- 495 Hirotsu, C., M. Rydlewski, M. S. Araujo, S. Tufik, and M. L. Andersen. 2012. Sleep  
496 loss and cytokines levels in an experimental model of psoriasis. *PLoS One* 7:e51183
- 497 Hofmann, M., J. Zaper, A. Bernd, J. Bereiter-Hahn, R. Kaufmann, and S. Kippenberger.  
498 2004. Mechanical pressure-induced phosphorylation of p38 mitogen-activated protein  
499 kinase in epithelial cells via Src and protein kinase C. *Biochem Biophys Res Commun*  
500 316:673-679
- 501 Igal, R. A., P. Wang, and R. A. Coleman. 1997. Triacsin C blocks de novo synthesis of  
502 glycerolipids and cholesterol esters but not recycling of fatty acid into phospholipid:  
503 evidence for functionally separate pools of acyl-CoA. *Biochem J* 324 ( Pt 2):529-534
- 504 Ishikawa, J., H. Narita, N. Kondo, M. Hotta, Y. Takagi, Y. Masukawa, T. Kitahara, Y.  
505 Takema, S. Koyano, S. Yamazaki, and A. Hatamochi. 2010. Changes in the ceramide  
506 profile of atopic dermatitis patients. *J Invest Dermatol* 130:2511-2514
- 507 Köbner, H. 1876. Zur Aetiologie Psoriasis. *Vjschr Dermatol* 3:559
- 508 Katagiri, K., S. Arakawa, and R. Kurahashi. 2008. IL-4 restores impaired contact  
509 hypersensitivity response in obese mice fed a high-fat diet enriched with oleic acid. *J*  
510 *Invest Dermatol* 128:735-737
- 511 Kim, S. K., M. Yun, G. Seo, J. Y. Lee, and S. B. Lee. 2017. Palmitate induces  
512 RIP1/RIP3-dependent necrosis via MLKL-mediated pore formation in the plasma  
513 membrane of RAW 264.7 cells. *Biochem Biophys Res Commun* 482:359-365
- 514 Knies, Y., A. Bernd, R. Kaufmann, J. Bereiter-Hahn, and S. Kippenberger. 2006.  
515 Mechanical stretch induces clustering of beta1-integrins and facilitates adhesion. *Exp*  
516 *Dermatol* 15:347-355
- 517 Krysko, D. V., T. Vanden Berghe, K. D'Herde, and P. Vandenabeele. 2008. Apoptosis  
518 and necrosis: detection, discrimination and phagocytosis. *Methods* 44:205-221
- 519 Li, W., R. Sandhoff, M. Kono, P. Zerfas, V. Hoffmann, B. C. Ding, R. L. Proia, and C. X.  
520 Deng. 2007. Depletion of ceramides with very long chain fatty acids causes defective  
521 skin permeability barrier function, and neonatal lethality in ELOVL4 deficient mice. *Int*  
522 *J Biol Sci* 3:120-128
- 523 Liu, M., K. Saeki, T. Matsunobu, T. Okuno, T. Koga, Y. Sugimoto, C. Yokoyama, S.  
524 Nakamizo, K. Kabashima, S. Narumiya, T. Shimizu, and T. Yokomizo. 2014.  
525 12-Hydroxyheptadecatrienoic acid promotes epidermal wound healing by accelerating  
526 keratinocyte migration via the BLT2 receptor. *J Exp Med* 211:1063-1078
- 527 Matsuzaka, T., A. Atsumi, R. Matsumori, T. Nie, H. Shinozaki, N. Suzuki-Kemuriyama,  
528 M. Kuba, Y. Nakagawa, K. Ishii, M. Shimada, K. Kobayashi, S. Yatoh, A. Takahashi, K.

- 529 Takekoshi, H. Sone, N. Yahagi, H. Suzuki, S. Murata, M. Nakamuta, N. Yamada, and H.  
530 Shimano. 2012. Elovl6 promotes nonalcoholic steatohepatitis. *Hepatology*  
531 56:2199-2208
- 532 Matsuzaka, T., H. Shimano, N. Yahagi, T. Kato, A. Atsumi, T. Yamamoto, N. Inoue, M.  
533 Ishikawa, S. Okada, N. Ishigaki, H. Iwasaki, Y. Iwasaki, T. Karasawa, S. Kumadaki, T.  
534 Matsui, M. Sekiya, K. Ohashi, A. H. Hasty, Y. Nakagawa, A. Takahashi, H. Suzuki, S.  
535 Yatoh, H. Sone, H. Toyoshima, J. Osuga, and N. Yamada. 2007. Crucial role of a  
536 long-chain fatty acid elongase, Elovl6, in obesity-induced insulin resistance. *Nat Med*  
537 13:1193-1202
- 538 Matsuzaka, T., H. Shimano, N. Yahagi, T. Yoshikawa, M. Amemiya-Kudo, A. H. Hasty,  
539 H. Okazaki, Y. Tamura, Y. Iizuka, K. Ohashi, J. Osuga, A. Takahashi, S. Yato, H. Sone,  
540 S. Ishibashi, and N. Yamada. 2002. Cloning and characterization of a mammalian fatty  
541 acyl-CoA elongase as a lipogenic enzyme regulated by SREBPs. *J Lipid Res*  
542 43:911-920
- 543 Milne, J., and I. Zhitomirsky. 2018. Application of octanohydroxamic acid for  
544 liquid-liquid extraction of manganese oxides and fabrication of supercapacitor  
545 electrodes. *J Colloid Interface Sci* 515:50-57
- 546 Moravcova, A., Z. Cervinkova, O. Kucera, V. Mezera, D. Rychtrmoc, and H. Lotkova.  
547 2015. The effect of oleic and palmitic acid on induction of steatosis and cytotoxicity on  
548 rat hepatocytes in primary culture. *Physiol Res* 64 Suppl 5:S627-636
- 549 Nakagawa, T., S. Shimizu, T. Watanabe, O. Yamaguchi, K. Otsu, H. Yamagata, H.  
550 Inohara, T. Kubo, and Y. Tsujimoto. 2005. Cyclophilin D-dependent mitochondrial  
551 permeability transition regulates some necrotic but not apoptotic cell death. *Nature*  
552 434:652-658
- 553 Nakajima, S., B. Z. Igyarto, T. Honda, G. Egawa, A. Otsuka, M. Hara-Chikuma, N.  
554 Watanabe, S. F. Ziegler, M. Tomura, K. Inaba, Y. Miyachi, D. H. Kaplan, and K.  
555 Kabashima. 2012. Langerhans cells are critical in epicutaneous sensitization with  
556 protein antigen via thymic stromal lymphopoietin receptor signaling. *J Allergy Clin*  
557 *Immunol* 129:1048-1055 e1046
- 558 Nguyen, M. T., D. Hanzelmann, T. Hartner, A. Peschel, and F. Gotz. 2016. Skin-Specific  
559 Unsaturated Fatty Acids Boost the *Staphylococcus aureus* Innate Immune Response.  
560 *Infect Immun* 84:205-215
- 561 Onoue, A., K. Kabashima, M. Kobayashi, T. Mori, and Y. Tokura. 2009. Induction of  
562 eosinophil- and Th2-attracting epidermal chemokines and cutaneous late-phase reaction  
563 in tape-stripped skin. *Exp Dermatol* 18:1036-1043

- 564 Reichelt, J. 2007. Mechanotransduction of keratinocytes in culture and in the epidermis.  
565 *Eur J Cell Biol* 86:807-816
- 566 Saito, R., T. Matsuzaka, T. Karasawa, M. Sekiya, N. Okada, M. Igarashi, R. Matsumori,  
567 K. Ishii, Y. Nakagawa, H. Iwasaki, K. Kobayashi, S. Yatoh, A. Takahashi, H. Sone, H.  
568 Suzuki, N. Yahagi, N. Yamada, and H. Shimano. 2011. Macrophage Elovl6 deficiency  
569 ameliorates foam cell formation and reduces atherosclerosis in low-density lipoprotein  
570 receptor-deficient mice. *Arterioscler Thromb Vasc Biol* 31:1973-1979
- 571 Sassa, T., Y. Ohno, S. Suzuki, T. Nomura, C. Nishioka, T. Kashiwagi, T. Hirayama, M.  
572 Akiyama, R. Taguchi, H. Shimizu, S. Itohara, and A. Kihara. 2013. Impaired epidermal  
573 permeability barrier in mice lacking *elovl1*, the gene responsible for very-long-chain  
574 fatty acid production. *Mol Cell Biol* 33:2787-2796
- 575 Skrzeczynska-Moncznik, J., M. Bzowska, A. Nogiec, A. Sroka, M. Zarebski, L.  
576 Vallieres, and K. Guzik. 2015. Rapid externalization of 27-kDa heat shock protein  
577 (HSP27) and atypical cell death in neutrophils treated with the sphingolipid analog drug  
578 FTY720. *J Leukoc Biol* 98:591-599
- 579 Sun, X., J. Zhang, A. K. Macgibbon, P. Black, and G. W. Krissansen. 2011. Bovine milk  
580 fat enriched in conjugated linoleic and vaccenic acids attenuates allergic dermatitis in  
581 mice. *Clin Exp Allergy* 41:729-738
- 582 Sunaga, H., H. Matsui, M. Ueno, T. Maeno, T. Iso, M. R. Syamsunarno, S. Anjo, T.  
583 Matsuzaka, H. Shimano, T. Yokoyama, and M. Kurabayashi. 2013. Deranged fatty acid  
584 composition causes pulmonary fibrosis in Elovl6-deficient mice. *Nat Commun* 4:2563
- 585 Takahashi, T., Y. Kimura, K. Niwa, Y. Ohmiya, T. Fujimura, K. Yamasaki, and S. Aiba.  
586 2013. In vivo imaging demonstrates ATP release from murine keratinocytes and its  
587 involvement in cutaneous inflammation after tape stripping. *J Invest Dermatol*  
588 133:2407-2415
- 589 Verhoeven, E. W., S. de Klerk, F. W. Kraaimaat, P. C. van de Kerkhof, E. M. de Jong,  
590 and A. W. Evers. 2008. Biopsychosocial mechanisms of chronic itch in patients with  
591 skin diseases: a review. *Acta Derm Venereol* 88:211-218
- 592 Verhoeven, E. W., F. W. Kraaimaat, E. M. de Jong, J. Schalkwijk, P. C. van de Kerkhof,  
593 and A. W. Evers. 2009. Individual differences in the effect of daily stressors on  
594 psoriasis: a prospective study. *Br J Dermatol* 161:295-299
- 595 Wahlgren, C. F. 1999. Itch and atopic dermatitis: an overview. *J Dermatol* 26:770-779
- 596 Wang, H. W., J. S. Fang, X. Kuang, L. Y. Miao, C. Wang, G. L. Xia, M. L. King, and J.  
597 Zhang. 2012. Activity of long-chain acyl-CoA synthetase is required for maintaining  
598 meiotic arrest in *Xenopus laevis*. *Biol Reprod* 87:74



- 599 Wyatt, T., B. Baum, and G. Charras. 2016. A question of time: tissue adaptation to  
600 mechanical forces. *Curr Opin Cell Biol* 38:68-73
- 601 Yano, S., M. Komine, M. Fujimoto, H. Okochi, and K. Tamaki. 2006. Activation of Akt  
602 by mechanical stretching in human epidermal keratinocytes. *Exp Dermatol* 15:356-361
- 603 Zeng, F., J. P. Sherry, and N. C. Bols. 2016. Evaluating the toxic potential of  
604 benzothiazoles with the rainbow trout cell lines, RTgill-W1 and RTL-W1. *Chemosphere*  
605 155:308-318
- 606 Zhang, Y., Q. Li, E. Rao, Y. Sun, M. E. Grossmann, R. J. Morris, M. P. Cleary, and B. Li.  
607 2015. Epidermal Fatty Acid binding protein promotes skin inflammation induced by  
608 high-fat diet. *Immunity* 42:953-964
- 609 Zhao, W., H. Feng, W. Sun, K. Liu, J. J. Lu, and X. Chen. 2017. Tert-butyl  
610 hydroperoxide (t-BHP) induced apoptosis and necroptosis in endothelial cells: Roles of  
611 NOX4 and mitochondrion. *Redox Biol* 11:524-534
- 612
- 613

614 **Figures and legends**

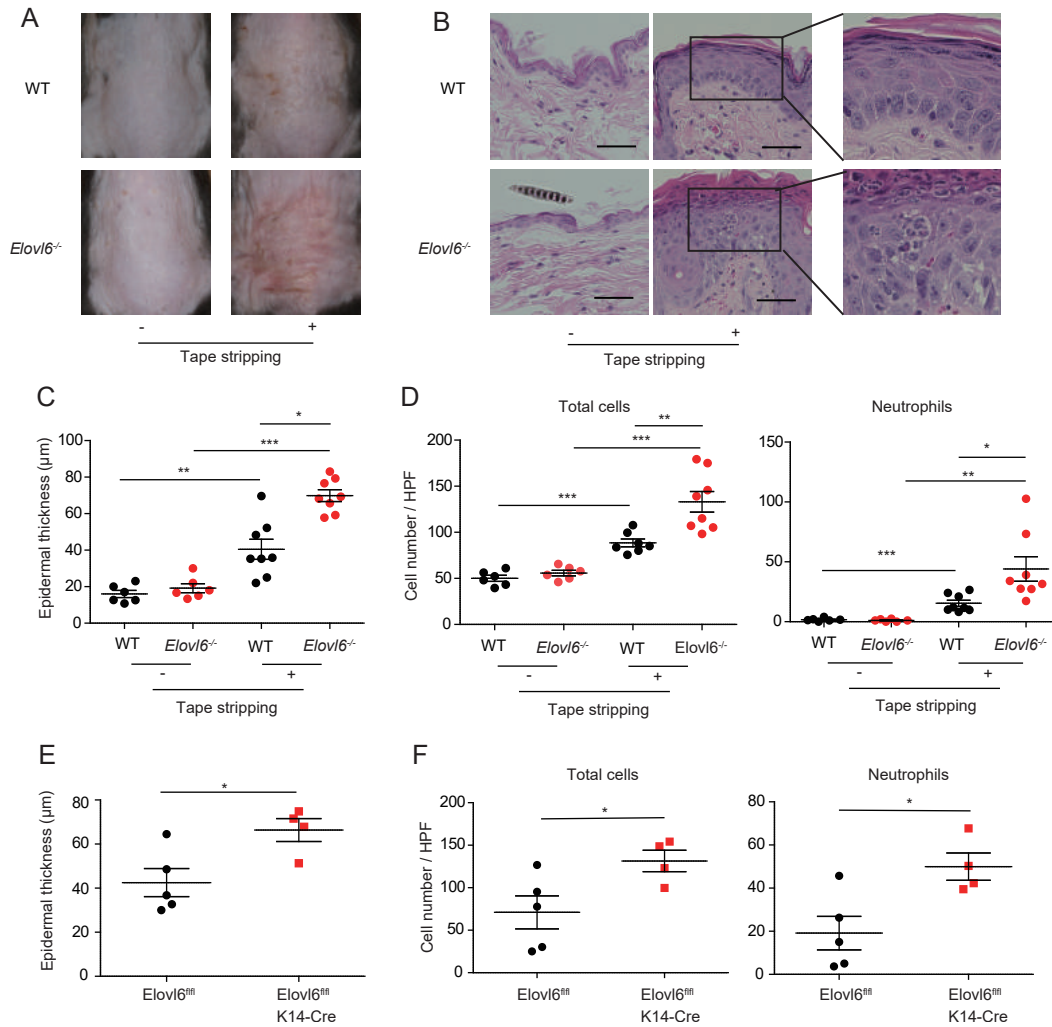

615 **Fig. 1. *Elov6*<sup>-/-</sup> mice show exacerbation of dermatitis.**  
 616 (A to D) Representative gross findings (A), histology (hematoxylin and eosin staining)  
 617 (B), epidermal thickness (C), and numbers of total infiltrating cells and neutrophils in  
 618 the dorsal skin (D) of wild-type (n =6 or 8) and *Elov6*<sup>-/-</sup> (n =6 or 8) mice before and on  
 619 day 9 after the start of tape stripping. (E, F) Epidermal thickness (E) and numbers of  
 620 total infiltrating cells and neutrophils in the skin (F) of *Elov6*<sup>fl/fl</sup> (n = 5) and  
 621 *Elov6*<sup>fl/fl</sup> K14-Cre (n = 4) on day 9 after the start of tape stripping. Black bars indicate  
 622 scale (50 µm) (B). Error bars indicate 1 SD; \*, *P*<0.05; \*\*, *P* < 0.01; \*\*\*, *P* < 0.001.  
 623 Data are representative of three (A-D) and two (E, F) independent experiments.

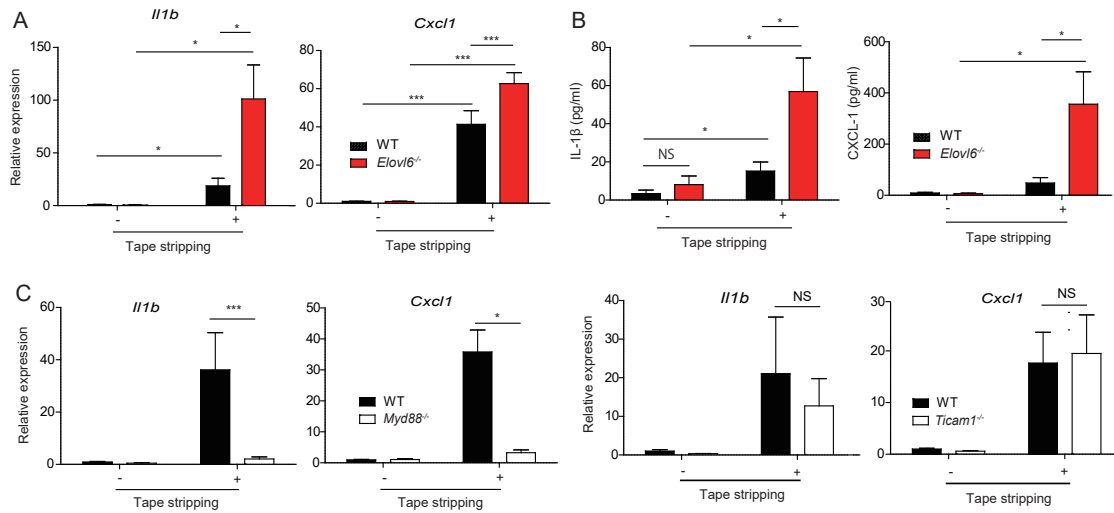

624

625 **Fig. 2. Elov6 suppresses mechanical damage-induced IL-1β and CXCL-1**  
626 **production**

627 (A) Quantitative RT-PCR analysis of epidermis of wild-type and *Elov6*<sup>-/-</sup> mice isolated  
628 6 h after tape stripping (n = 10 in each group). (B) Epidermis was isolated before, and  
629 12 h after, tape stripping from wild-type and *Elov6*<sup>-/-</sup> mice and cultured for 24 h. The  
630 concentrations of IL-1β and CXCL-1 in the supernatants were measured by using  
631 cytometric bead array (n = 11 per group). (C) Quantitative RT-PCR analysis of *Il1b* and  
632 *Cxcl1* in the epidermis of wild-type, *Myd88*<sup>-/-</sup>, and *Ticam1*<sup>-/-</sup> mice before, and 6 h after,  
633 tape stripping (n = 7 to 11 per group). Error bars indicate 1 SD; \*, P < 0.05; \*\*\*, P <  
634 0.001. Data are representative of three independent experiments.

635

636

637

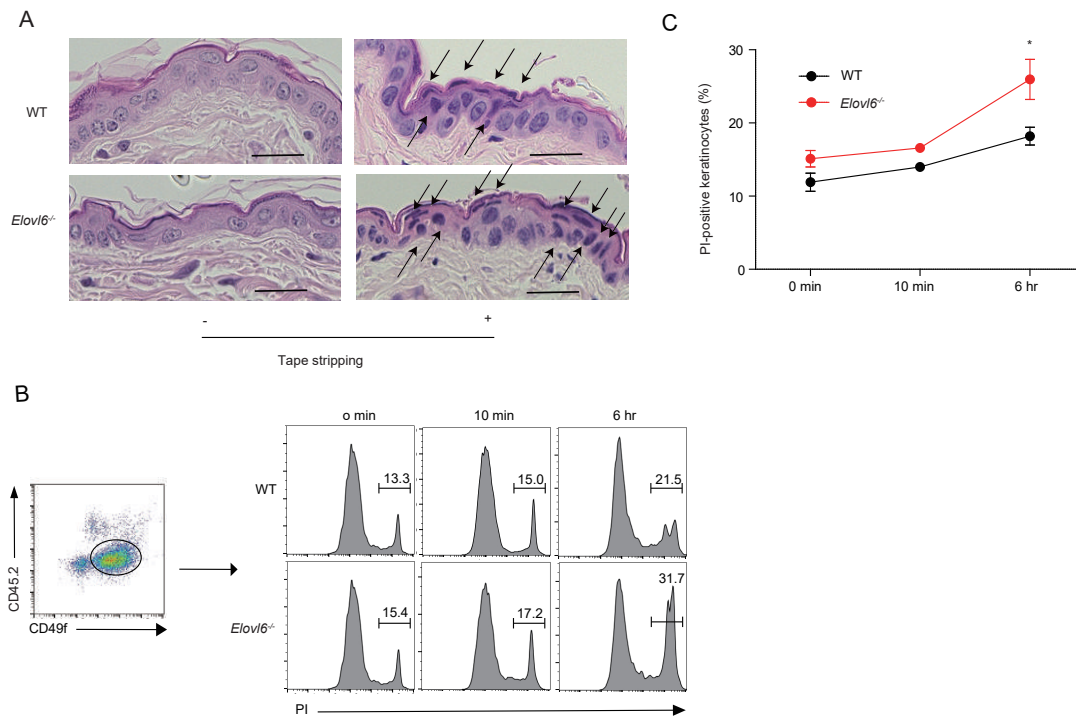

638

639

640 **Fig. 3. Elov6 suppressed mechanical damage-induced keratinocyte death.**

641 (A) Representative histopathology of wild-type and *Elov6*<sup>-/-</sup> mice 4 h after tape  
642 stripping. Black arrows indicate degenerated keartinocytes with irregularly shaped  
643 nuclei. Scale bar, 50 μm. (B, C) Flow cytometry of epidermal cells isolated from the  
644 skin of wild-type and *Elov6*<sup>-/-</sup> mice at the indicated time points after tape stripping.  
645 Cells were stained with anti-CD45.2, anti-CD49f and propidium iodide (PI) and the  
646 proportion of PI<sup>+</sup> cells in CD45.2-CD49f<sup>+</sup> cells were shown (n = 6 to 10 per group).  
647 Error bars indicate 1 SD; \*, P < 0.05. Data are representative of two independent  
648 experiments.

649

650

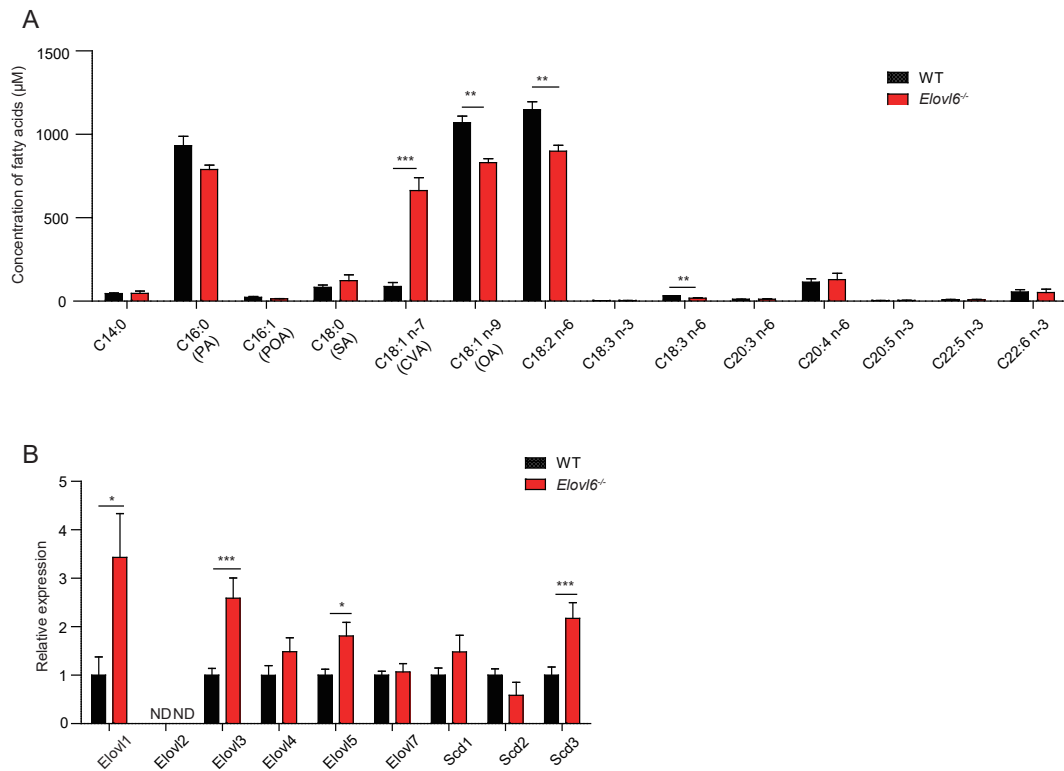

651

652 **Fig. 4. *Elov6* suppressed cis-vaccenic acid production in keratinocytes.**

653 (A) Fatty acid composition of epidermis in wild-type and *Elov6*<sup>-/-</sup> mice (n = 4 per

654 group). (B) Quantitative RT-PCR analysis of the epidermis for the expression of

655 long-chain fatty acid elongases and stearoyl-CoA desaturases in wild-type and *Elov6*<sup>-/-</sup>

656 mice (n=10). Error bars indicate SD. ND, not done. \*, *P*<0.05; \*\*, *P*<0.01; \*\*\**P*<0.001.

657

658

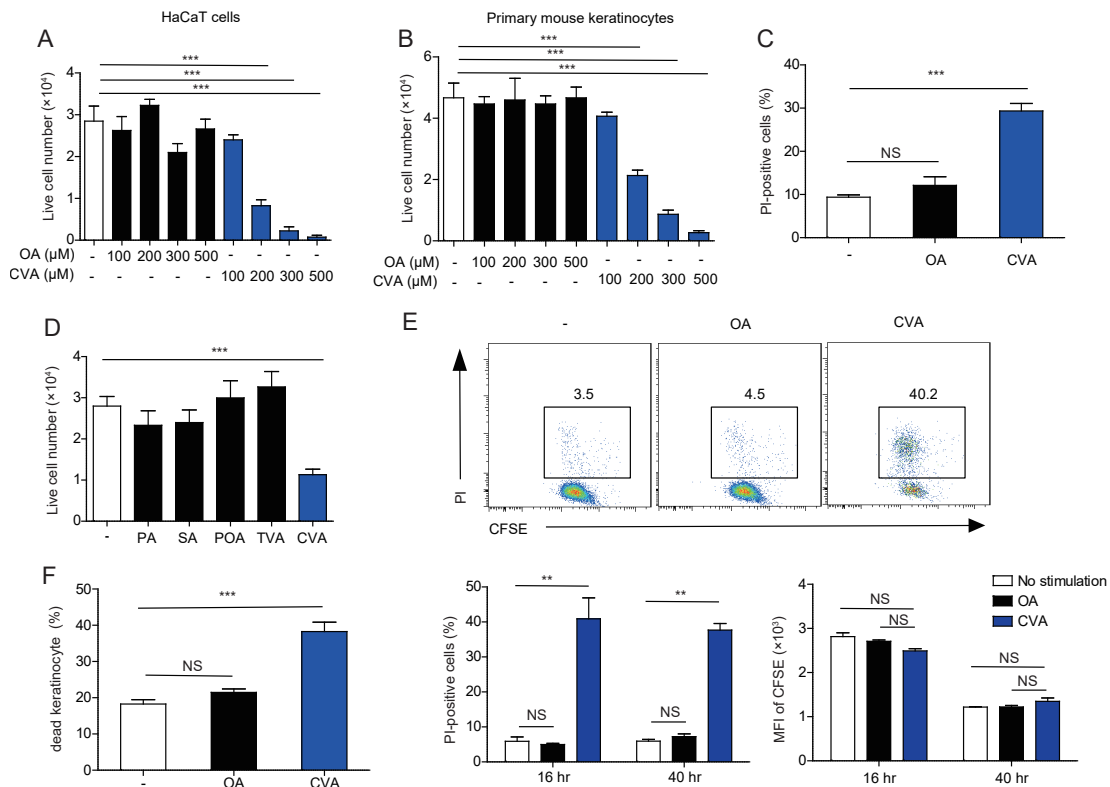

659

660 **Fig. 5. Cis-vaccenic acid (CVA) induces keratinocyte death in the skin.**

661 (A, B, D) Number of live cells in cultures of HaCaT cells (A) and primary keratinocytes  
662 (B, D) 16 h after stimulation with the indicated concentration of fatty acids (A, B) or  
663 with 300 μM of the indicated fatty acid (D) (n = 3 per group). (C) Primary keratinocytes  
664 were stimulated for 6 h with 300 μM of the indicated fatty acid and analyzed for  
665 propidium iodide (PI)-positive (i.e. dead) cells by flow cytometry (n = 4 or 5 per group).  
666 (E) HaCaT cells were labeled with 5-(and 6)-carboxyfluorescein diacetate succinimidyl  
667 ester (CFSE) and stimulated or not with 300 μM of OA or CVA for 16 h or 40 h. Cells  
668 were then stained with propidium iodide (PI) and analyzed by flow cytometry. (F) Flow  
669 cytometry of epidermal cells isolated from the skin of wild-type mice that received  
670 topical application of ethanol (control) or 45mM of OA or CVA to the dorsal skin for 6 h  
671 (n = 6 per group). Error bars indicate SD. \*\*, *P*<0.01; \*\*\*, *P*<0.001.

672

673

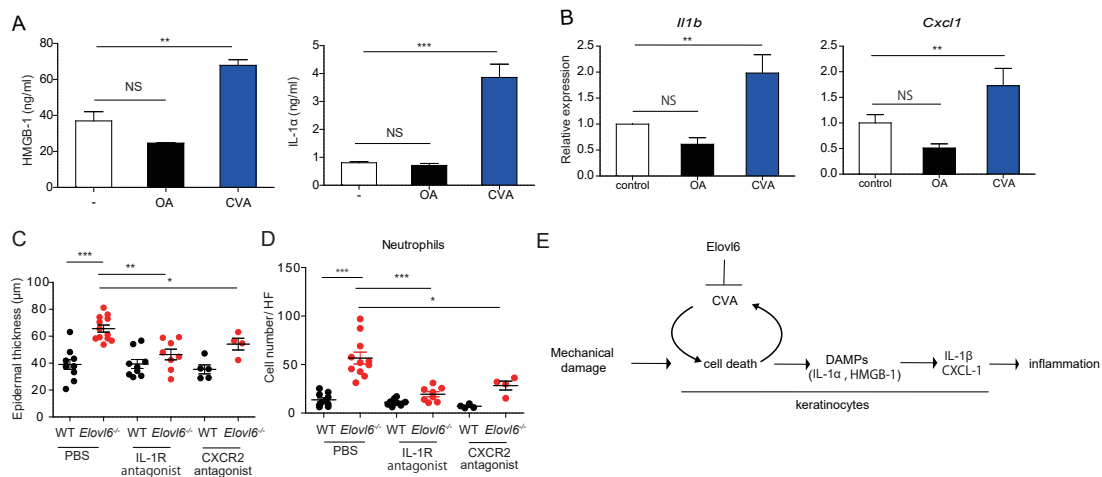

674

675 **Fig. 6. CVA increased IL-1β and CXCL-1 production.**

676 (A) Enzyme-linked immunosorbent assay of HMGB-1 (n = 4 per group) and cytokine  
 677 bead array of IL-1α (n = 3 per group) in the supernatant of cultured primary  
 678 keratinocytes 10 h after initiation of stimulation with 300 μM OA or CVA. (B)  
 679 Quantitative RT-PCR analysis of *Il1b* and *Cxcl1* in the epidermis of wild-type mice 6 h  
 680 after topical application of ethanol (control) (n = 10) or 15mM of OA (n = 13) or CVA  
 681 (n = 14) (B). (C, D) Wild-type and *Elovl6*<sup>-/-</sup> mice were treated with PBS (n = 10 and 12,  
 682 respectively), an IL-1 receptor antagonist (n = 9 and 8, respectively), or a CXCR-2  
 683 antagonist (n = 5 and 4, respectively) daily for 9 days, from the beginning on the day of  
 684 tape stripping. Epidermal thickness (C) and the number of infiltrating neutrophils (D)  
 685 were analyzed on day 9. (E) A proposed signal pathway from mechanical damage onto  
 686 the skin to skin inflammation. Error bars indicate SD; \*, *P* < 0.05; \*\*, *P* < 0.01, \*\*\*, *P*  
 687 < 0.001; NS, not significant. Data are representative of at least two independent  
 688 experiments.

689

690

691

692

693 **Supplementary Figures**

694

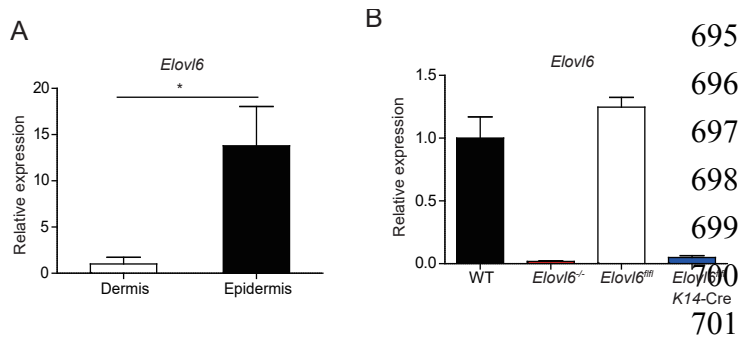

702 **Fig. S1. Expression of *Elov16*.**

703 Quantitative RT-PCR analysis of *Elov16* from dermis and epidermis (n = 3 per group)  
704 (A) and from the epidermis of wild-type (WT), *Elov16*<sup>-/-</sup>, *Elov16*<sup>fl/fl</sup>, *Elov16*<sup>fl/fl</sup> K14-Cre  
705 mice (n=3 to 5 in each group) (B). Error bars indicate SD. \**P*<0.05. Data are  
706 representative of more than two independent experiments.

707

708

709

710

711

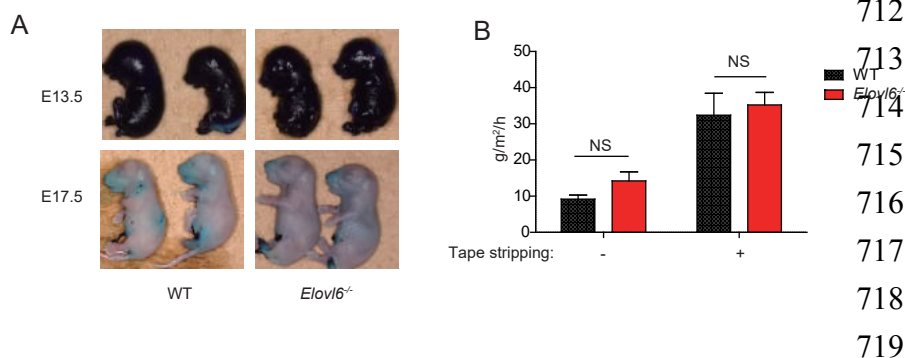

720 **Fig. S2. Comparable skin permeability barrier function between wild-type (WT)**  
721 **and *Elov16*<sup>-/-</sup> mice.**

722 (A) The fetuses at E13.5 and E17.5 from WT and *Elov16*<sup>-/-</sup> mice were stained with 0.1%  
723 toluidine blue for 24 h and photographed. (B) The transepidermal water loss of 6-8  
724 weeks old WT and *Elov16*<sup>-/-</sup> mice was measured before and after tape stripping (n = 14).  
725 Error bars indicate SD. NS, not significant. Data are representative of three independent  
726 experiments.

727

728



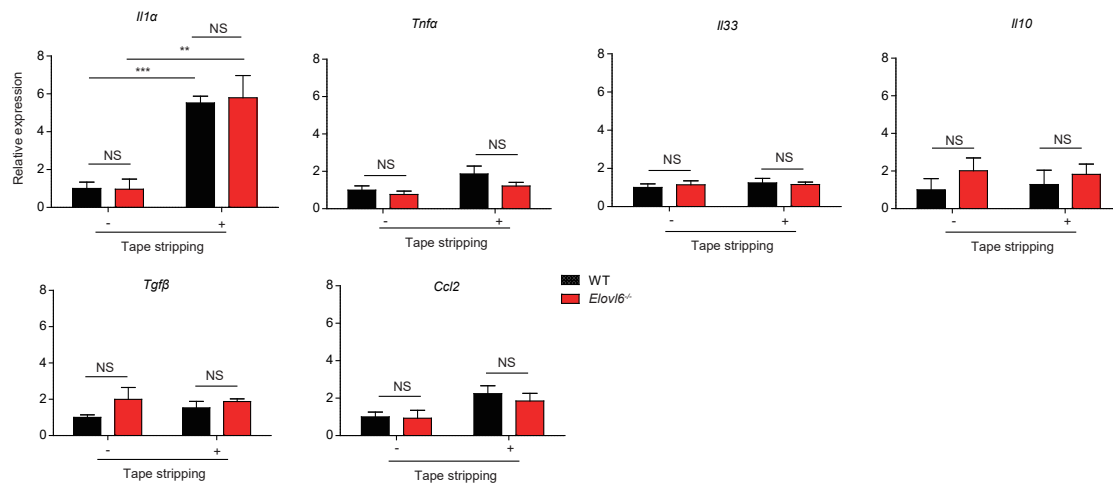

729

730

731 **Fig. S3. Expression of cytokines**

732 Quantitative RT-PCR analysis of the epidermis isolated before and 12 h after tape

733 stripping from WT and *Elov6*<sup>-/-</sup> mice and cultured for 24 h (n = 11 in each group). Error

734 bars indicate SD. NS, not significant. \*\*P<0.01, \*\*\*P<0.001. Data are representative of

735 two independent experiments.

736

737

738

739

740

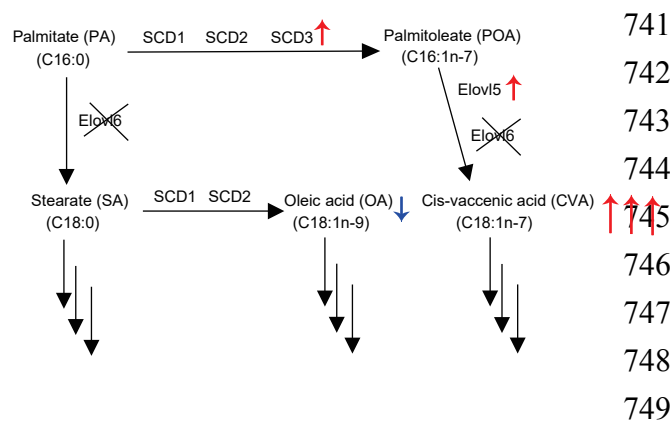

741

742

743

744

745

746

747

748

749

750 **Fig. S4. Schematic representation of the proposed pathway (black arrows)**

751 **controlling cis-vaccenic acid (CVA) generation in *Elov6*<sup>-/-</sup> keratinocyte.**

752 Red and blue arrows indicate the increase in SCD3, Elov5, and CVA and the decrease

753 in OA, respectively.

754

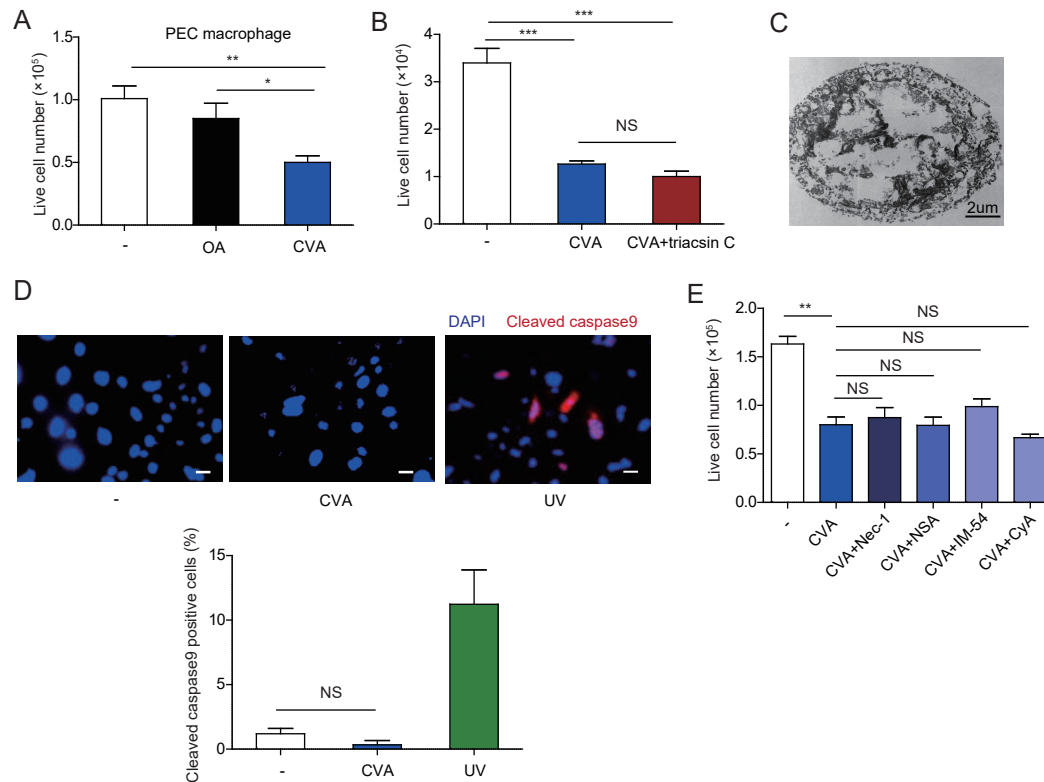

755

756

757 **Fig. S5. CVA induced non-programmed cell death.**

758 (A) Live cell number of primary peritoneal macrophages 16 h after stimulation with  
 759 oleic acid (OA) or CVA (300  $\mu$ M) (n = 3 in each group). (B, E) Primary mouse  
 760 keratinocytes were cultured for 6 h in the presence or absence of 10  $\mu$ M of triacsin C  
 761 (B), or 1 mM necrostatin (Nec-1), 1 mM necrosulfonamide (NSA), 2 mM IM-54, or 1  
 762 mM cyclosporine (CyA) (E), followed by stimulation by adding 300  $\mu$ M CVA; live cells  
 763 were counted 16 h afterward (n = 3). (C) A representative dead primary keratinocyte  
 764 induced by stimulation with 300  $\mu$ M CVA for 10 h under a transmission electron  
 765 microscope. (D) Immunofluorescence microscopic study of primary keratinocyte 10 h  
 766 after stimulation with CVA or 6 h after ultraviolet irradiation. Cells were stained with  
 767 anti-cleaved caspase 9, followed by Alexa Fluor 594-conjugated secondary antibody  
 768 and DAPI. White bars indicate a scale (20  $\mu$ m). Percentage of cleaved caspase  
 769 9-positive cells was calculated (n = 3). Error bars indicate SD. NS, not significant. \*,  
 770  $P < 0.05$ ; \*\*,  $P < 0.01$ ; \*\*\*,  $P < 0.001$ . Data are representative of more than two  
 771 independent experiments.

772

773

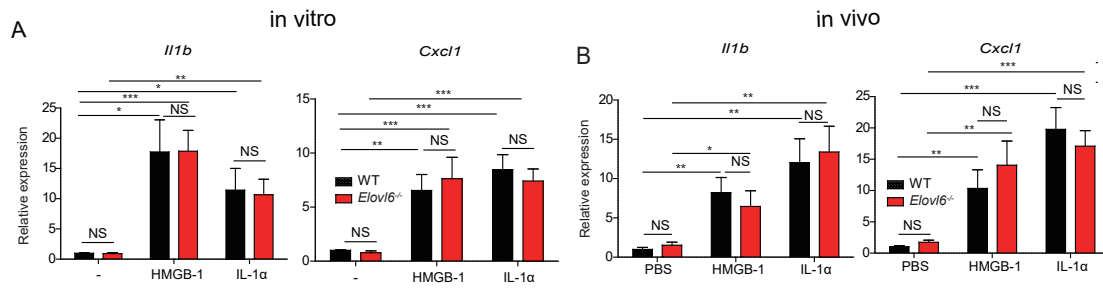

774

775 **Fig. S6. DAMPs increased IL-1 $\beta$  and CXCL-1 production.**

776 Quantitative RT-PCR analysis of *Il1 $\beta$*  and *Cxcl1* in keratinocytes of wild-type and  
777 *Elov6*<sup>-/-</sup> mice after stimulation or not with HMGB-1 or IL-1 $\alpha$  in vitro (n=10 per group)  
778 (A) and in the epidermis isolated 4 h after injection intradermally with PBS, HMGB-1,  
779 or IL-1 $\alpha$  (n = 8 per each group) (B).

780

781

782

783
